# Supplementary material for: Vitamin D status of tuberculosis patients with diabetes mellitus in different economic areas and associated factors in China
Source: PLoS One. 2018 Nov 1;13(11):e0206372. doi: 10.1371/journal.pone.0206372 (PMC6211694; doi:10.1371/journal.pone.0206372)
Supplement: S1 File — (XLS) [file pone.0206372.s001.xls]

## Sheet: 178 DM
id	y01	x01	z01	economic areas	x02	x03	age	gender	residence	x06	Months	Category	TB Type	x09	x10	x11	x12	x13	x14	x15	x16	x17	smoking	x18	x19	DM history	x20	DM treatment	x21	x22	x23	x24	x25	FBG control	x26	HbA1c level	VitD1	VitD2	VitD3
1	3	1	1	1	1	29	1	1	1	2	1	2	2	2	#NULL!	1	1	0	0	0	0	2	2	1	2	1	2	1	0	0	0	1	15.26	4	10.4	3	16.1	2	1
3	3	1	1	1	3	55	2	1	1	3	1	2	2	#NULL!	#NULL!	0	1	1	0	0	0	1	1	1	3	2	1	1	0	0	0	1	9.51	2	6.2	1	20.2	3	0
4	3	1	1	1	4	47	1	1	1	3	1	2	2	#NULL!	#NULL!	1	1	0	0	1	0	2	2	1	3	2	2	1	0	0	0	1	15.18	4	7.7	2	16.1	2	1
5	3	1	1	1	5	68	2	1	1	2	1	1	2	#NULL!	#NULL!	1	1	0	0	0	0	2	2	1	1	3	4	2	0	0	0	1	10.21	3	10.6	3	9	1	1
6	3	1	1	1	6	44	1	1	1	3	1	1	1	#NULL!	#NULL!	1	1	1	0	0	1	2	2	1	2	1	2	1	1	0	0	0	7.22	2	8.6	2	16.7	2	1
7	3	1	1	1	7	29	1	1	1	2	1	1	2	#NULL!	#NULL!	1	1	1	0	1	1	1	1	1	1	3	4	2	0	0	0	1	16.47	4	7.7	2	13.1	2	1
8	3	1	1	1	8	59	2	2	1	2	1	1	2	#NULL!	#NULL!	1	1	0	0	0	1	1	1	1	1	3	4	2	0	0	0	1	9.5	2	7	2	16.8	2	1
9	3	1	1	1	9	66	2	2	1	2	1	1	2	#NULL!	#NULL!	1	1	0	0	0	1	1	1	1	1	3	4	2	0	0	0	1	8.71	2	10.7	3	5.5	1	1
10	3	1	1	1	10	50	2	1	1	3	1	2	2	#NULL!	#NULL!	0	1	0	0	0	1	1	1	1	3	2	2	1	0	1	0	0	17.7	4	11.9	3	19.6	2	1
11	3	1	1	1	11	60	2	1	1	2	1	1	2	#NULL!	#NULL!	0	1	0	0	0	1	1	1	1	2	1	2	1	0	0	0	1	12.77	4	9.8	2	16.2	2	1
12	3	1	1	1	12	46	1	1	1	4	1	1	1	#NULL!	#NULL!	1	1	0	0	0	0	3	2	1	3	2	2	1	1	1	0	0	8.93	2	7.8	2	16	2	1
14	3	1	1	1	14	25	1	1	2	6	2	2	2	#NULL!	#NULL!	1	1	0	0	0	1	4	2	1	1	3	4	2	0	0	0	1	13.28	4	6.5	1	10.9	2	1
15	3	1	1	1	15	39	1	2	2	1	1	1	2	#NULL!	#NULL!	1	1	1	0	0	1	1	1	1	2	1	2	1	0	0	0	1	12	4	10	3	10.7	2	1
16	3	1	1	1	16	35	1	1	1	5	2	1	2	#NULL!	#NULL!	1	1	0	0	0	1	3	2	1	2	1	4	2	0	0	0	1	7.49	2	10.8	3	9.4	1	1
17	3	1	1	1	17	40	1	1	1	2	1	2	2	#NULL!	#NULL!	0	1	0	0	0	1	2	2	1	2	1	2	1	0	0	0	1	12.9	4	11.1	3	11.9	2	1
18	3	1	1	1	18	46	1	1	2	3	1	2	2	#NULL!	#NULL!	0	1	1	0	0	1	2	2	1	2	1	2	1	0	0	0	1	25.49	4	13.1	3	8.3	1	1
19	3	1	1	1	19	71	2	2	1	2	1	1	1	#NULL!	#NULL!	1	1	0	0	0	1	1	1	1	3	2	1	1	0	0	0	1	13.4	4	10.2	3	11.9	2	1
22	3	1	1	1	22	70	2	1	2	4	1	1	2	#NULL!	#NULL!	1	1	1	0	0	1	1	1	1	1	3	4	2	0	0	0	1	11.1	3	6.3	1	17	2	1
23	3	1	1	1	23	43	1	1	1	4	1	1	2	#NULL!	#NULL!	1	1	0	0	0	1	2	2	1	2	1	2	1	1	0	0	0	13.11	4	10.1	3	10.5	2	1
24	3	1	1	1	24	54	2	2	1	4	1	1	2	#NULL!	#NULL!	1	1	0	0	0	1	1	1	1	2	1	2	1	0	0	0	0	7.22	2	9.3	2	24.2	3	0
25	3	1	1	1	25	59	2	2	2	4	1	1	2	#NULL!	#NULL!	0	1	0	0	0	1	1	1	1	2	1	2	1	0	0	0	1	6.4	1	9	2	15.9	2	1
26	3	1	1	1	26	57	2	2	1	4	1	1	3	1	#NULL!	0	0	0	0	0	1	1	1	1	3	2	2	1	0	1	0	0	18	4	4.6	1	26.5	3	0
29	3	1	1	1	29	47	1	2	1	5	2	1	2	#NULL!	#NULL!	1	1	0	0	0	1	1	1	1	2	1	2	1	0	0	0	1	8.49	2	10.9	3	22.9	3	0
30	3	1	1	1	30	47	1	1	1	5	2	1	2	#NULL!	#NULL!	1	1	0	0	0	1	2	2	1	2	1	2	1	0	0	0	1	11.2	3	10.1	3	9.6	1	1
31	3	1	1	1	31	52	2	1	1	4	1	1	2	#NULL!	#NULL!	1	1	0	0	0	0	2	2	1	2	1	2	1	0	0	0	1	15.3	4	11.9	3	16.3	2	1
34	3	1	1	1	34	63	2	1	1	5	2	1	3	2	#NULL!	0	1	0	0	1	1	2	2	1	2	1	2	1	0	0	0	1	11.73	3	9.3	2	7.5	1	1
35	3	1	1	1	35	58	2	1	1	5	2	2	2	#NULL!	#NULL!	1	1	0	0	0	1	3	2	1	3	2	1	1	1	0	0	0	12.88	4	10.2	3	11.4	2	1
36	3	1	1	1	36	62	2	1	1	6	2	1	2	#NULL!	#NULL!	1	1	0	0	0	1	3	2	1	3	2	2	1	0	0	0	1	7.04	2	10.4	3	6.1	1	1
37	3	1	1	1	37	65	2	1	2	7	2	2	2	#NULL!	#NULL!	0	1	0	0	0	1	2	2	1	1	3	4	2	0	0	0	1	9.3	2	6	1	6.1	1	1
39	3	1	1	1	39	71	2	1	2	7	2	1	2	#NULL!	#NULL!	1	1	0	0	0	1	1	1	1	2	1	1	1	0	0	0	1	12.39	4	9.3	2	17.5	2	1
40	3	1	1	1	40	47	1	2	1	7	2	2	2	#NULL!	#NULL!	1	1	0	0	0	1	1	1	1	2	1	2	1	0	0	0	1	9.6	2	7.5	2	28.4	3	0
41	3	1	1	1	41	43	1	1	1	7	2	2	2	#NULL!	#NULL!	1	1	0	0	0	1	2	2	1	1	3	4	2	0	0	0	1	7.2	2	5.6	1	13.7	2	1
42	3	1	1	1	42	37	1	1	2	7	2	2	2	#NULL!	#NULL!	1	1	0	0	0	1	3	2	1	2	1	2	1	0	0	0	1	6.9	1	6.9	1	22.6	3	0
43	3	1	1	1	43	62	2	1	2	7	2	1	2	#NULL!	#NULL!	1	1	1	0	0	1	1	1	1	1	3	4	2	0	0	0	1	18.6	4	11.3	3	12.2	2	1
44	3	1	1	1	44	59	2	2	2	4	1	1	2	#NULL!	#NULL!	1	1	0	0	0	1	1	1	1	1	3	4	2	0	0	0	1	10.25	3	11	3	8	1	1
45	3	1	1	1	45	44	1	1	2	4	1	2	2	#NULL!	#NULL!	0	1	1	0	0	1	2	2	1	3	2	1	1	0	0	0	1	14.8	4	9.2	2	16.9	2	1
46	3	1	1	1	46	45	1	1	1	6	2	1	2	#NULL!	#NULL!	1	1	0	0	0	1	1	1	1	1	3	4	2	0	0	0	1	8.54	2	10	3	19.8	2	1
47	3	1	1	1	47	48	1	1	1	8	2	1	2	#NULL!	#NULL!	1	1	0	0	0	1	2	2	1	2	1	4	2	1	0	0	0	12.58	4	0.6	1	24.2	3	0
48	3	2	0	2	1	58	2	2	1	11	1	1	1	#NULL!	#NULL!	1	1	1	1	1	1	1	1	1	2	1	2	1	0	0	0	1	7.41	2	7.1	2	20.4	3	0
49	3	2	0	2	2	60	2	2	2	9	2	1	1	#NULL!	#NULL!	1	1	0	0	0	1	1	1	1	2	1	1	1	0	0	0	1	14.45	4	10.2	3	13.3	2	1
50	3	2	0	2	3	46	1	1	2	8	2	1	2	#NULL!	#NULL!	0	1	0	1	1	1	1	1	1	2	1	1	1	0	0	0	1	10.49	3	10.6	3	16.9	2	1
51	3	2	0	2	4	31	1	1	1	11	1	1	2	#NULL!	#NULL!	0	1	0	0	0	1	2	2	1	2	1	1	1	0	0	0	1	5.38	1	7.5	2	14.5	2	1
52	3	2	0	2	5	40	1	1	2	1	1	1	1	#NULL!	#NULL!	1	1	0	1	0	0	2	2	1	1	3	4	2	0	0	0	1	17.58	4	10	3	11	2	1
53	3	2	0	2	6	62	2	2	2	2	1	1	1	#NULL!	#NULL!	1	1	0	0	0	1	1	1	1	2	1	2	1	0	0	0	1	7.57	2	6.9	1	11.3	2	1
54	3	2	0	2	7	64	2	1	2	1	1	1	2	#NULL!	#NULL!	0	1	0	0	0	1	4	2	1	3	2	1	1	0	0	0	1	14.94	4	12.1	3	6.3	1	1
55	3	2	0	2	8	58	2	2	2	4	1	2	2	#NULL!	#NULL!	0	1	0	1	0	1	1	1	1	3	2	2	1	0	0	0	1	15.5	4	11.29	3	11.5	2	1
56	3	2	0	2	9	45	1	1	2	2	1	1	1	#NULL!	#NULL!	0	1	1	1	0	0	2	2	1	2	1	2	1	0	0	0	1	12.4	4	9.8	2	14.2	2	1
57	3	2	0	2	10	48	1	1	1	1	1	2	1	#NULL!	#NULL!	1	1	0	0	0	0	3	2	1	2	1	2	1	0	0	0	1	17.76	4	9.7	2	11.4	2	1
60	3	2	0	2	13	65	2	1	2	1	1	1	1	#NULL!	#NULL!	0	1	1	0	1	0	1	1	1	1	3	4	2	0	0	0	1	12.73	4	12.2	3	7.6	1	1
64	3	2	0	2	17	31	1	1	2	10	2	1	1	#NULL!	#NULL!	1	1	1	0	0	0	4	2	1	2	1	2	1	0	0	0	1	7.41	2	7.1	2	6.9	1	1
65	3	2	0	2	18	69	2	1	1	2	1	1	2	#NULL!	#NULL!	0	1	0	1	0	0	1	1	1	3	2	2	1	0	0	0	1	7.09	2	10.3	3	9.6	1	1
66	3	2	0	2	19	58	2	1	2	1	1	2	2	#NULL!	#NULL!	0	1	1	1	0	0	3	2	1	1	3	4	2	0	0	0	1	8.91	2	7	2	17.8	2	1
67	3	2	0	2	20	56	2	1	2	3	1	1	1	#NULL!	#NULL!	1	1	0	#NULL!	0	0	1	1	1	2	1	2	1	0	0	0	1	13.67	4	9.5	2	10.8	2	1
68	3	2	0	2	21	54	2	2	2	2	1	1	2	#NULL!	#NULL!	1	1	0	1	0	0	2	2	1	2	1	1	1	0	0	0	1	9.74	2	9.8	2	14.6	2	1
69	3	2	0	2	22	45	1	1	1	3	1	1	1	#NULL!	#NULL!	1	1	1	1	0	0	2	2	1	3	2	2	1	0	0	0	1	13.27	4	10.4	3	12.1	2	1
70	3	2	0	2	23	60	2	2	2	3	1	2	2	#NULL!	#NULL!	1	1	0	1	0	0	1	1	1	3	2	2	1	0	0	0	1	11.78	3	8.2	2	10.3	2	1
73	3	2	0	2	26	52	2	1	2	4	1	2	2	#NULL!	#NULL!	1	1	1	0	0	0	4	2	1	2	1	1	1	0	0	0	1	9.76	2	10	3	13.9	2	1
75	3	2	0	2	28	26	1	1	1	4	1	1	1	#NULL!	#NULL!	1	1	0	1	0	0	4	2	1	2	1	2	1	0	0	0	1	13.29	4	11.9	3	8.1	1	1
77	3	2	0	2	30	52	2	1	1	5	2	1	1	#NULL!	#NULL!	0	1	0	1	0	1	2	2	1	2	1	1	1	0	0	0	1	13.81	4	10.9	3	5.3	1	1
78	3	2	0	2	31	54	2	2	1	4	1	1	2	#NULL!	#NULL!	1	1	1	0	0	0	3	2	1	1	3	4	2	0	0	0	1	7.07	2	5.4	1	13.2	2	1
79	3	2	0	2	32	61	2	2	1	5	2	1	2	#NULL!	#NULL!	0	0	1	0	0	0	1	1	1	3	2	2	1	0	0	0	1	5.96	1	5.9	1	11.4	2	1
80	3	2	0	2	33	50	2	1	1	5	2	1	2	#NULL!	#NULL!	1	1	1	0	0	0	1	1	1	2	1	1	1	0	0	0	1	6.94	1	14.3	3	17.7	2	1
84	3	2	0	2	37	51	2	2	2	5	2	2	2	#NULL!	#NULL!	0	1	0	1	0	1	1	1	1	1	3	4	2	1	1	0	0	7.03	2	9.91	2	16.1	2	1
105	3	3	0	1	1	64	2	1	1	2	1	2	2	#NULL!	#NULL!	0	1	0	1	0	0	3	2	1	1	3	4	2	0	0	0	1	7.2	2	5.5	1	28.6	3	0
106	3	3	0	1	2	47	1	1	2	12	1	2	2	#NULL!	#NULL!	0	1	1	0	0	0	2	2	1	2	1	1	1	0	0	0	1	11.7	3	8.3	2	24	3	0
107	3	3	0	1	3	50	2	1	2	2	1	1	2	#NULL!	#NULL!	0	1	0	0	1	1	2	2	1	2	1	1	1	1	1	0	0	7.48	2	5.3	1	22.4	3	0
108	3	3	0	1	4	56	2	2	2	3	1	1	1	#NULL!	#NULL!	1	1	0	0	0	1	1	1	1	1	3	4	2	0	0	0	1	8.23	2	7.7	2	34.6	4	0
109	3	3	0	1	5	49	1	1	2	3	1	1	1	#NULL!	#NULL!	0	1	0	1	0	0	3	2	1	1	3	4	2	0	0	0	1	9.6	2	7.64	2	31.6	4	0
119	3	3	0	1	15	68	2	1	2	6	2	1	1	#NULL!	#NULL!	0	1	0	1	0	0	3	2	1	1	3	4	2	0	0	0	1	9.09	2	9.67	2	26.1	3	0
126	3	3	0	1	22	62	2	2	2	6	2	1	1	#NULL!	#NULL!	0	1	0	1	0	0	1	1	1	1	3	4	2	0	0	0	1	9.92	2	6.1	1	21.3	3	0
131	3	5	0	1	1	68	2	2	2	2	1	1	2	#NULL!	#NULL!	0	1	0	1	1	0	3	2	1	1	3	4	2	0	0	0	1	7.02	2	7.36	2	13.5	2	1
132	3	5	0	1	2	66	2	1	2	1	1	1	1	#NULL!	#NULL!	1	1	0	1	0	0	3	2	1	1	3	4	2	0	0	0	1	7.58	2	7.45	2	12.4	2	1
133	3	5	0	1	3	53	2	2	2	12	1	1	1	#NULL!	#NULL!	1	1	0	1	0	0	1	1	1	2	1	2	1	0	0	0	1	10.51	3	13.8	3	5	1	1
134	3	5	0	1	4	69	2	1	2	2	1	2	2	#NULL!	#NULL!	1	1	0	1	0	0	3	2	1	1	3	4	2	0	0	0	1	9.24	2	12.36	3	11.4	2	1
135	3	5	0	1	5	58	2	1	2	2	1	2	2	#NULL!	#NULL!	1	1	0	0	1	0	4	2	1	1	3	4	2	0	0	0	1	8.52	2	9.05	2	32.1	4	0
137	3	5	0	1	7	75	2	2	2	4	1	1	2	#NULL!	#NULL!	1	1	0	0	0	0	1	1	1	3	2	2	1	0	0	0	1	8.88	2	8.07	2	5.9	1	1
138	3	5	0	1	8	62	2	1	2	4	1	2	1	#NULL!	#NULL!	1	1	0	1	0	0	1	1	1	1	3	4	2	0	0	0	1	10.08	3	9.09	2	3.8	1	1
140	3	5	0	1	10	50	2	1	2	4	1	1	2	#NULL!	#NULL!	1	1	0	1	0	0	3	2	1	1	3	4	2	0	0	0	1	7.42	2	9.92	2	12.1	2	1
141	3	5	0	1	11	64	2	1	2	4	1	1	1	#NULL!	#NULL!	1	1	0	1	0	0	3	2	1	2	1	2	1	0	0	0	1	10.7	3	12.05	3	8.8	1	1
142	3	5	0	1	12	46	1	1	1	4	1	1	2	#NULL!	#NULL!	0	1	0	1	0	0	4	2	1	1	3	4	2	0	0	0	1	10.81	3	14.5	3	16.6	2	1
145	3	5	0	1	15	51	2	1	2	4	1	2	1	#NULL!	#NULL!	0	1	0	1	0	1	3	2	1	3	2	2	1	0	0	0	1	20.75	4	18.96	3	8.5	1	1
146	3	5	0	1	16	68	2	1	2	4	1	2	2	#NULL!	#NULL!	0	1	0	0	0	0	1	1	1	2	1	2	1	0	0	0	1	3.03	1	9.7	2	5.8	1	1
148	3	5	0	1	18	63	2	1	2	4	1	1	2	#NULL!	#NULL!	1	0	0	1	1	0	2	2	1	2	1	2	1	0	0	0	1	11.24	3	8.76	2	3.2	1	1
150	3	5	0	1	20	62	2	2	1	5	2	2	2	#NULL!	#NULL!	0	1	0	1	0	0	2	2	1	2	1	1	1	0	0	0	1	10.14	3	5.6	1	5	1	1
151	3	5	0	1	21	69	2	1	2	5	2	1	1	#NULL!	#NULL!	0	0	0	0	0	0	4	2	1	2	1	2	1	0	0	0	1	10.9	3	10.2	3	12.4	2	1
152	3	5	0	1	22	65	2	2	2	5	2	1	1	#NULL!	#NULL!	1	1	1	0	0	0	1	1	1	1	3	4	2	0	0	0	1	14.47	4	11.4	3	11.7	2	1
153	3	5	0	1	23	53	2	2	2	8	2	1	2	#NULL!	#NULL!	0	1	1	1	0	0	1	1	1	2	1	2	1	0	0	0	1	7.75	2	9.87	2	3	1	1
155	3	5	0	1	25	38	1	1	2	1	1	1	2	#NULL!	#NULL!	1	1	0	1	0	1	1	1	1	3	2	2	1	0	0	0	1	8.25	2	9.8	2	17.8	2	1
157	3	5	0	1	27	69	2	2	2	5	2	2	1	#NULL!	#NULL!	0	1	1	1	1	0	1	1	1	3	2	2	1	0	0	0	1	7.79	2	13.6	3	10.4	2	1
159	3	5	0	1	29	50	2	1	1	5	2	1	2	#NULL!	#NULL!	1	1	0	0	0	0	3	2	1	1	3	4	2	0	0	0	1	8	2	5.6	1	5.9	1	1
160	3	5	0	1	30	64	2	1	2	5	2	2	2	#NULL!	#NULL!	0	1	0	0	1	0	3	2	1	1	3	4	2	0	0	0	1	7.78	2	6.7	1	15.2	2	1
161	3	5	0	1	31	50	2	1	2	10	2	2	2	#NULL!	#NULL!	0	1	1	1	0	0	3	2	1	1	3	4	2	0	0	0	1	9.11	2	10.96	3	6.9	1	1
163	3	5	0	1	33	65	2	2	2	5	2	1	2	#NULL!	#NULL!	0	1	1	1	0	0	1	1	1	1	3	4	2	0	0	0	1	12.86	4	13.97	3	6.1	1	1
164	3	5	0	1	34	59	2	2	2	6	2	1	2	#NULL!	#NULL!	0	1	0	0	0	1	1	1	1	1	3	4	2	0	0	0	1	15.62	4	10.5	3	19.6	2	1
221	3	6	0	1	29	67	2	1	2	5	2	1	2	#NULL!	#NULL!	1	1	0	0	0	1	1	1	1	2	1	1	1	0	0	0	1	14.45	4	8.8	2	28.8	3	0
225	3	6	0	1	33	70	2	1	1	5	2	2	1	#NULL!	#NULL!	1	1	1	0	0	0	4	2	1	3	2	2	1	0	0	0	1	7.93	2	9.4	2	10.2	2	1
226	3	6	0	1	34	35	1	1	1	5	2	1	1	#NULL!	#NULL!	0	1	0	0	0	1	4	2	1	2	1	2	1	0	0	0	1	21.54	4	14	3	28	3	0
232	3	6	0	1	40	58	2	1	2	4	1	1	2	2	#NULL!	0	1	0	1	0	0	3	2	1	2	1	2	1	0	0	0	1	10.32	3	10.6	3	16.8	2	1
237	3	6	0	1	45	61	2	1	2	4	1	1	2	2	#NULL!	1	1	0	1	0	0	3	2	1	2	1	2	1	0	0	0	1	7.87	2	6.3	1	24	3	0
238	3	6	0	1	46	71	2	2	2	3	1	1	1	#NULL!	#NULL!	0	1	1	0	0	1	1	1	1	1	3	4	2	0	0	0	1	7.7	2	5.5	1	10.7	2	1
239	3	6	0	1	47	54	2	2	2	3	1	1	2	#NULL!	#NULL!	0	1	1	0	0	1	1	1	1	2	1	1	1	0	0	0	1	9.48	2	5.9	1	11.1	2	1
240	3	6	0	1	48	65	2	2	2	3	1	1	2	#NULL!	#NULL!	0	1	0	1	0	1	1	1	1	1	3	4	2	0	0	0	1	7.07	2	9.8	2	8.7	1	1
241	3	6	0	1	49	60	2	1	1	3	1	2	2	#NULL!	#NULL!	0	1	0	1	0	1	3	2	1	3	2	2	1	0	0	0	1	13.29	4	11.6	3	13.8	2	1
242	3	6	0	1	50	48	1	1	2	3	1	1	1	#NULL!	#NULL!	1	1	0	0	0	1	3	2	1	2	1	2	1	0	0	0	1	11.38	3	11.5	3	4.7	1	1
243	3	6	0	1	51	71	2	1	2	3	1	2	2	2	#NULL!	0	1	0	1	0	0	1	1	1	1	3	4	2	0	0	0	1	7.17	2	10.9	3	11.7	2	1
247	3	6	0	1	55	49	1	2	1	3	1	2	2	#NULL!	#NULL!	0	1	0	0	1	1	1	1	1	3	2	2	1	0	0	0	1	16.56	4	9.6	2	14.8	2	1
249	3	6	0	1	57	47	1	2	1	3	1	1	3	2	#NULL!	0	0	0	1	0	1	1	1	1	1	3	4	2	0	0	0	1	8.15	2	6.5	1	9.9	1	1
250	3	6	0	1	58	69	2	1	1	3	1	1	1	#NULL!	#NULL!	0	1	0	0	0	1	3	2	1	2	1	2	1	0	0	0	1	9.22	2	9.3	2	11	2	1
252	3	6	0	1	60	67	2	1	2	3	1	1	3	2	#NULL!	1	1	0	1	0	0	3	2	1	1	3	4	2	0	0	0	1	7.79	2	7.5	2	7.9	1	1
254	3	6	0	1	62	57	2	2	2	3	1	1	2	#NULL!	#NULL!	0	1	0	1	0	0	1	1	1	4	2	2	1	0	0	0	1	13.6	4	11.2	3	10.7	2	1
255	3	6	0	1	63	71	2	2	2	3	1	1	3	2	#NULL!	1	0	0	1	0	1	1	1	1	1	3	4	2	0	0	0	1	7.87	2	5.1	1	12.4	2	1
256	3	6	0	1	64	64	2	1	1	3	1	1	2	#NULL!	#NULL!	0	1	1	0	0	0	2	2	1	3	2	2	1	0	0	0	1	14.28	4	10.8	3	7.3	1	1
257	3	6	0	1	65	61	2	1	1	3	1	1	2	#NULL!	#NULL!	0	1	0	1	0	0	1	1	1	4	2	2	1	0	0	0	1	14.17	4	8.6	2	10.1	2	1
258	3	6	0	1	66	81	2	1	2	3	1	1	2	#NULL!	#NULL!	0	1	0	1	0	0	1	1	1	1	3	4	2	0	0	0	1	7.58	2	4.7	1	10.7	2	1
259	3	6	0	1	67	60	2	2	2	2	1	1	2	#NULL!	#NULL!	0	1	0	1	0	0	1	1	1	1	3	4	2	0	0	0	1	7.92	2	7	2	7.8	1	1
260	3	6	0	1	68	49	1	1	2	2	1	1	3	2	#NULL!	1	1	0	1	0	0	3	2	1	2	1	1	1	0	0	0	1	7.15	2	10.1	3	18.5	2	1
261	3	6	0	1	69	61	2	1	2	2	1	1	1	#NULL!	#NULL!	1	1	0	0	0	1	1	1	1	2	1	2	1	0	0	0	1	13.32	4	9.2	2	10.7	2	1
263	3	6	0	1	71	63	2	1	2	2	1	1	2	#NULL!	#NULL!	1	1	0	1	0	0	3	2	1	2	1	2	1	0	0	0	1	6.41	1	8.3	2	22.2	3	0
267	3	6	0	1	75	60	2	1	1	1	1	1	3	2	#NULL!	0	1	0	1	0	0	3	2	1	1	3	4	2	0	0	0	1	8.1	2	5.6	1	18.7	2	1
268	3	6	0	1	76	59	2	2	2	1	1	1	2	#NULL!	#NULL!	0	1	1	0	0	0	1	1	1	3	2	2	1	0	0	0	1	11.96	3	7.1	2	25.1	3	0
270	3	6	0	1	78	45	1	1	2	1	1	2	1	#NULL!	#NULL!	0	1	0	0	0	0	1	1	1	3	2	2	1	0	0	0	1	7.62	2	8.3	2	15.1	2	1
271	3	6	0	1	79	29	1	1	2	1	1	1	2	#NULL!	#NULL!	0	1	0	1	0	0	1	1	1	2	1	2	1	0	0	0	1	6.82	1	9	2	13.9	2	1
273	3	6	0	1	81	49	1	1	1	1	1	1	1	#NULL!	#NULL!	1	1	0	0	0	0	2	2	1	1	3	4	2	0	0	0	1	8.03	2	7.2	2	9.2	1	1
274	3	6	0	1	82	73	2	1	2	12	1	1	1	#NULL!	#NULL!	1	1	0	0	0	1	3	2	1	1	3	4	2	0	0	0	1	11.59	3	10.6	3	5.8	1	1
275	3	6	0	1	83	52	2	1	1	10	2	1	1	#NULL!	#NULL!	0	1	0	0	0	0	2	2	1	3	2	2	1	0	0	0	1	14.22	4	11	3	15	2	1
278	3	6	0	1	86	34	1	1	1	1	1	1	2	#NULL!	#NULL!	0	1	0	0	0	0	1	1	1	3	2	2	1	1	0	0	0	10.38	3	10.7	3	2	1	1
279	3	7	1	3	1	75	2	1	1	11	1	1	1	#NULL!	#NULL!	1	1	0	0	0	0	3	2	1	2	1	1	1	0	0	0	1	10.9	3	10.2	3	5.5	1	1
280	3	7	1	3	2	52	2	1	1	11	1	1	3	2	#NULL!	1	1	0	1	1	1	4	2	1	3	2	1	1	0	0	0	1	15.8	4	12.1	3	15.3	2	1
281	3	7	1	3	3	34	1	1	2	11	1	1	3	2	#NULL!	1	0	0	0	0	1	4	2	1	1	3	4	2	0	0	0	1	10.2	3	9.2	2	23.4	3	0
282	3	7	1	3	4	64	2	1	1	11	1	2	1	#NULL!	#NULL!	1	1	0	0	0	0	4	2	1	2	1	1	1	0	0	0	1	10.1	3	10.7	3	6	1	1
283	3	7	1	3	5	64	2	1	1	10	2	1	1	#NULL!	#NULL!	0	1	0	0	0	0	2	2	1	3	2	1	1	1	0	0	0	7.1	2	7.7	2	10.4	2	1
284	3	7	1	3	6	33	1	1	1	11	1	1	1	#NULL!	#NULL!	1	1	1	0	0	0	4	2	1	2	1	2	1	0	0	0	1	16.8	4	12.1	3	8.4	1	1
285	3	7	1	3	7	53	2	1	2	11	1	1	1	#NULL!	#NULL!	0	1	0	0	1	1	4	2	1	2	1	2	1	1	1	0	0	13.2	4	7.7	2	4.6	1	1
286	3	7	1	3	8	74	2	2	1	11	1	2	2	#NULL!	#NULL!	1	1	0	1	0	0	1	1	1	4	2	2	1	1	1	0	0	8.5	2	8.8	2	11.9	2	1
287	3	7	1	3	9	57	2	1	1	12	1	2	1	#NULL!	#NULL!	0	1	0	0	0	1	2	2	1	2	1	2	1	1	0	0	0	11.5	3	7.4	2	22.7	3	0
288	3	7	1	3	10	46	1	1	1	11	1	1	2	#NULL!	#NULL!	0	0	0	0	0	0	1	1	1	3	2	2	1	0	1	0	0	26.8	4	10.4	3	7.3	1	1
289	3	7	1	3	11	45	1	1	1	11	1	1	1	#NULL!	#NULL!	0	1	1	0	0	0	4	2	1	2	1	1	1	0	0	0	1	10.3	3	11.8	3	5.7	1	1
290	3	7	1	3	12	57	2	2	1	11	1	1	2	#NULL!	#NULL!	0	1	0	1	0	0	1	1	1	2	1	1	1	0	0	0	1	7.7	2	6.7	1	11.2	2	1
291	3	7	1	3	13	40	1	1	1	11	1	2	1	#NULL!	#NULL!	0	1	0	1	1	0	1	1	1	1	3	4	2	0	0	0	1	7.6	2	6.5	1	19.7	2	1
292	3	7	1	3	14	51	2	1	1	11	1	1	1	#NULL!	#NULL!	0	1	0	0	0	0	4	2	1	3	2	2	1	1	0	0	0	9.1	2	7	2	16.1	2	1
293	3	7	1	3	15	66	2	2	1	11	1	2	2	#NULL!	#NULL!	0	1	0	0	1	0	1	1	1	1	3	4	2	0	0	0	1	7.6	2	5.8	1	15.1	2	1
294	3	7	1	3	16	77	2	2	1	12	1	1	1	#NULL!	#NULL!	1	1	0	0	1	0	1	1	1	2	1	1	1	1	1	0	0	10.3	3	6.1	1	6.5	1	1
295	3	7	1	3	17	81	2	1	1	11	1	2	2	#NULL!	#NULL!	0	1	0	0	1	0	4	2	1	1	3	4	2	0	0	0	1	9	2	6.2	1	20.9	3	0
296	3	7	1	3	18	50	2	1	1	12	1	1	1	#NULL!	#NULL!	0	1	0	0	0	0	4	2	1	3	2	1	1	0	0	0	1	7.1	2	8.9	2	20.5	3	0
297	3	7	1	3	19	42	1	1	1	11	1	1	1	#NULL!	#NULL!	1	1	0	0	0	0	3	2	1	3	2	2	1	0	0	0	1	8.8	2	7.7	2	15.5	2	1
298	3	7	1	3	20	54	2	1	2	11	1	1	3	6	#NULL!	1	0	0	0	0	1	3	2	1	2	1	2	1	0	0	0	1	14.1	4	10.3	3	5.6	1	1
299	3	7	1	3	21	44	1	1	1	11	1	2	1	#NULL!	#NULL!	1	2	0	1	1	0	4	2	1	3	2	2	1	1	0	0	1	10.1	3	5.9	1	12.4	2	1
300	3	7	1	3	22	52	2	1	1	1	1	1	1	#NULL!	#NULL!	0	1	0	0	0	0	4	2	1	3	2	1	1	0	0	0	1	8.9	2	8	2	10.2	2	1
301	3	7	1	3	23	63	2	1	1	1	1	1	1	#NULL!	#NULL!	1	0	0	0	0	0	4	2	1	1	3	4	2	0	0	0	1	9.9	2	9.7	2	16.5	2	1
302	3	7	1	3	24	44	1	1	2	11	1	1	1	#NULL!	#NULL!	1	1	0	0	0	0	4	2	1	2	1	1	1	1	0	0	0	16.8	4	11.2	3	23.3	3	0
303	3	7	1	3	25	47	1	1	2	11	1	1	1	#NULL!	#NULL!	1	1	0	0	0	0	1	1	1	2	1	1	1	0	0	0	1	7.2	2	6.6	1	15.3	2	1
304	3	7	1	3	26	64	2	1	1	11	1	2	1	#NULL!	#NULL!	1	1	0	0	0	0	1	1	1	3	2	2	1	0	0	0	1	12.8	4	10.5	3	13.4	2	1
305	3	7	1	3	27	73	2	2	1	12	1	1	1	#NULL!	#NULL!	0	1	1	0	0	0	1	1	1	3	2	1	1	0	0	0	1	9.1	2	9.9	2	12.4	2	1
306	3	7	1	3	29	54	2	1	1	11	1	1	1	#NULL!	#NULL!	0	1	0	0	0	0	4	2	1	3	2	1	1	0	0	0	1	8.9	2	7.9	2	14.3	2	1
307	3	7	1	3	30	75	2	1	2	12	1	1	1	#NULL!	#NULL!	1	1	0	0	0	0	4	2	1	3	2	2	1	0	0	0	1	7.5	2	10.5	3	16.9	2	1
308	3	7	1	3	31	54	2	1	1	12	1	2	1	#NULL!	#NULL!	0	1	0	0	0	0	1	1	1	2	1	2	1	0	0	0	1	12.2	4	9	2	30.9	4	0
309	3	7	1	3	32	46	1	1	1	12	1	1	3	2	#NULL!	0	1	0	4	0	0	1	1	1	2	1	2	1	0	0	0	1	10.1	3	10.4	3	5.7	1	1
310	3	7	1	3	33	57	2	1	1	12	1	2	2	#NULL!	#NULL!	0	0	0	0	1	0	4	2	1	2	1	3	1	0	0	0	1	15.2	4	10.2	3	7	1	1
311	3	7	1	3	34	76	2	1	2	11	1	1	1	#NULL!	#NULL!	0	1	0	0	0	0	4	2	1	2	1	1	1	0	0	0	1	7.8	2	6.7	1	15.3	2	1
312	3	7	1	3	35	70	2	1	1	12	1	1	1	#NULL!	#NULL!	0	1	0	0	0	0	1	1	1	3	2	2	1	0	0	0	1	10.3	3	10.6	3	5.1	1	1
313	3	7	1	3	36	29	1	1	2	12	1	1	1	#NULL!	#NULL!	0	1	1	0	0	0	4	2	1	1	3	4	2	0	0	0	1	17.4	4	13.6	3	12.6	2	1
314	3	7	1	3	37	49	1	1	2	11	1	1	1	#NULL!	#NULL!	0	1	0	1	0	0	1	1	1	2	1	2	1	0	0	0	1	8.7	2	9.8	2	31.9	4	0
315	3	7	1	3	38	67	2	1	1	12	1	2	1	#NULL!	#NULL!	1	1	0	0	0	0	1	1	1	3	2	2	1	0	0	0	1	13.7	4	8.9	2	7.7	1	1
316	3	7	1	3	39	29	1	1	1	12	1	1	1	#NULL!	#NULL!	0	1	0	0	0	0	3	2	1	1	3	4	2	0	0	0	1	10.1	3	10	3	7.4	1	1
317	3	7	1	3	40	37	1	1	1	12	1	2	1	#NULL!	#NULL!	0	1	0	0	0	0	1	1	1	1	3	4	2	0	0	0	1	7	1	10.3	3	9.6	1	1
318	3	7	1	3	42	89	2	1	1	1	1	2	1	#NULL!	#NULL!	0	1	0	1	1	0	1	1	1	1	3	4	2	0	0	0	1	10.2	3	9	2	8.1	1	1
319	3	7	1	3	43	75	2	2	1	12	1	1	1	#NULL!	#NULL!	0	1	0	0	1	0	1	1	1	1	3	4	2	0	0	0	1	7.7	2	6.1	1	13.5	2	1
320	3	7	1	3	44	86	2	1	1	12	1	1	3	2	#NULL!	1	0	0	0	1	0	4	2	1	1	3	4	2	0	0	0	1	10.6	3	10.2	3	7.6	1	1
321	3	7	1	3	45	77	2	2	1	12	1	1	1	#NULL!	#NULL!	0	1	0	0	0	0	1	1	1	1	3	4	2	0	0	0	1	7.3	2	11.2	3	10.7	2	1
322	3	7	1	3	46	45	1	1	2	10	2	1	1	#NULL!	#NULL!	1	1	0	1	1	0	3	2	1	2	1	2	1	0	0	1	0	9.4	2	8.6	2	6.4	1	1
323	3	7	1	3	47	67	2	2	2	12	1	1	1	#NULL!	#NULL!	0	1	1	0	0	0	1	1	1	3	2	2	1	0	0	0	1	7.5	2	7.6	2	7.1	1	1
324	3	7	1	3	48	43	1	1	2	12	1	2	2	#NULL!	#NULL!	1	0	0	0	0	1	1	1	1	1	3	4	2	1	0	0	0	21.8	4	5.7	1	5.2	1	1
325	3	7	1	3	49	81	2	2	2	12	1	2	2	#NULL!	#NULL!	1	0	1	0	0	0	1	1	1	3	2	2	1	0	0	0	0	16.8	4	10.9	3	11.7	2	1
326	3	7	1	3	50	43	1	1	2	12	1	2	2	#NULL!	#NULL!	1	1	0	0	0	0	3	2	1	2	1	2	1	0	0	0	1	16	4	10	3	4.9	1	1
327	3	7	1	3	28	50	2	2	1	12	1	1	1	#NULL!	#NULL!	0	1	0	0	1	0	1	1	1	3	2	1	1	0	0	0	1	18.5	4	12.9	3	11.1	2	1
328	3	7	1	3	41	62	2	1	2	12	1	1	1	#NULL!	#NULL!	1	1	0	0	0	0	1	1	1	2	1	2	1	0	0	0	1	9.7	2	11.5	3	22.7	3	0
351	3	4	1	1	23	66	2	1	2	4	1	1	3	#NULL!	#NULL!	1	0	0	0	0	1	3	2	1	3	2	1	1	0	0	0	1	11.1	3	10.2	3	8.7	1	1
352	3	4	1	1	24	41	1	1	1	5	2	1	2	#NULL!	#NULL!	1	1	0	0	0	0	3	2	1	1	3	4	2	0	0	0	1	7.7	2	10.1	3	9.8	1	1
